# Supplementary material
Source: PubMed Central journal article supplement (PMC9348823)
Supplement: mmc1.pdf [file mmc1.pdf]

# THE LANCET

## Microbe

### Supplementary appendix

This translation in Spanish was submitted by the authors and we reproduce it as supplied. It has not been peer reviewed. *The Lancet's* editorial processes have only been applied to the original in English, which should serve as reference for this manuscript.

Los autores nos proporcionaron esta traducción al español y la reproducimos tal como nos fue entregada. No la hemos revisado. Los procesos editoriales de *The Lancet* se han aplicado únicamente al original en inglés, que debe servir de referencia para este manuscrito.

Supplement to: Sempere J, Llamosí M, Ruiz B L, et al. Effect of pneumococcal conjugate vaccines and SARS-CoV-2 on antimicrobial resistance and the emergence of *Streptococcus pneumoniae* serotypes with reduced susceptibility in Spain, 2004–20: a national surveillance study. *Lancet Microbe* 2022; published online August 3. [https://doi.org/10.1016/S2666-5247\(22\)00127-6](https://doi.org/10.1016/S2666-5247(22)00127-6).

## Resumen

**Introducción** Los estudios epidemiológicos son necesarios para explorar el efecto de las actuales vacunas antineumocócicas conjugadas (PCVs) frente a la resistencia antibiótica incluyendo el aumento de serotipos resistentes no vacunales. En este estudio, se estudiaron los cambios epidemiológicos en el patrón de resistencia antimicrobiana de *Streptococcus pneumoniae* antes y durante el primer año de pandemia por la COVID-19.

**Métodos** En este estudio de vigilancia nacional, hemos caracterizado la sensibilidad antibiótica a un panel de antibióticos en 3017 aislados clínicos de neumococo con sensibilidad disminuida a penicilina durante 2004–20 en España. Este estudio cubrió los periodos temprano y tardío de PCV7; los periodos temprano, intermedio y tardío de PCV13; y el primer año de pandemia por la COVID-19, para evaluar la contribución de las diferentes PCVs y la pandemia al aumento de serotipos no vacunales con resistencia antibiótica.

**Hallazgos** Los serotipos incluidos en PCV7 y PCV13 mostraron una disminución tras la introducción de las PCVs en España. Sin embargo, apareció pronto un incremento en serotipos no-PCV13 que no eran sensibles a penicilina (principalmente el 11A, 24F y 23B). Se observó un aumento en la proporción de cepas de neumococo con sensibilidad disminuida a  $\beta$ -lactámicos y eritromicina en 2020, coincidiendo con la aparición del SARS-CoV-2. Cefditoren fue el  $\beta$ -lactámico con la concentración mínima inhibitoria (CMI)<sub>50</sub> y CMI<sub>90</sub> más baja, y mostró la mayor proporción de cepas sensibles a lo largo del 2004–20.

**Interpretación** El aumento de serotipos no-PCV13 asociados a resistencia antibiótica es preocupante, especialmente, el incremento de la resistencia a penicilina asociada a los serotipos 11A y 24F. El futuro uso de las vacunas PCVs con un mayor espectro de cobertura (como la PCV20, que incluye el serotipo 11A) podría reducir el impacto de la resistencia antibiótica frente a los serotipos no-PCV13. El uso de antibióticos para prevenir las coinfecciones en pacientes con la COVID-19 podría haber afectado al aumento en la proporción de cepas resistentes de neumococo. La cefotaxima como opción parenteral y el cefditoren como tratamiento de elección oral, fueron los antibióticos con las mayores actividades antimicrobianas frente a los serotipos no-PCV20.
