# Supplementary material
Source: PubMed Central journal article supplement (PMC9348823)
Supplement: mmc2.pdf [file mmc2.pdf]

# THE LANCET Microbe

## Supplementary appendix 2

This appendix formed part of the original submission and has been peer reviewed. We post it as supplied by the authors.

Supplement to: Sempere J, Llamosí M, Ruiz B L, et al. Effect of pneumococcal conjugate vaccines and SARS-CoV-2 on antimicrobial resistance and the emergence of *Streptococcus pneumoniae* serotypes with reduced susceptibility in Spain, 2004–20: a national surveillance study. Lancet Microbe 2022; published online August 3. [https://doi.org/10.1016/S2666-5247\(22\)00127-6](https://doi.org/10.1016/S2666-5247(22)00127-6).

## SUPPORTING INFORMATION

Effect of pneumococcal conjugate vaccines and SARS-CoV-2 on antimicrobial resistance and the emergence of *Streptococcus pneumoniae* serotypes with reduced susceptibility in Spain, 2004–20: a national surveillance study

Julio Sempere†, Mirella Llamosí†, Beatriz López Ruiz, Idoia del Río, Covadonga Pérez García, Darío Lago, Mercedes Gimeno, Pilar Coronel, Fernando González-Camacho, Mirian Domenech\* and Jose Yuste\*

Spanish Pneumococcal Reference Laboratory, National Center for Microbiology, Instituto de Salud Carlos III, Madrid, Spain (J Sempere PhD, M Llamosí BsC, B López Ruiz AS, I del Río AS, C Pérez García BsC, D Lago BsC, F González-Camacho PhD, M Domenech PhD, J Yuste PhD), Scientific Department, Meiji Pharma Spain, Madrid, Spain (M Gimeno PhD, P Coronel hD) Department of Genetics, Physiology and Microbiology, University Complutense Madrid, Madrid, Spain (M Domenech) and CIBER de Enfermedades Respiratorias (CIBERES), Madrid, Spain (J Sempere, M Domenech, J Yuste).

### Content

|                                                                                                   |   |
|---------------------------------------------------------------------------------------------------|---|
| Figure S1: Timeline for the selection of clinical isolates.                                       | 2 |
| Table S1: Distribution of pneumococcal strains per year.                                          | 3 |
| Table S2: Breakpoints considered for the different antibiotics of the study.                      | 4 |
| Figure S2: Evolution of susceptible strains to different antibiotics during the period 2004-2020. | 5 |

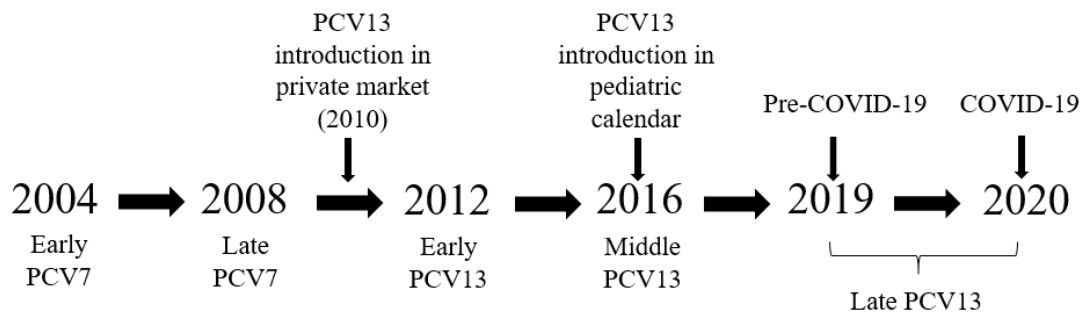

**Figure S1: Timeline for the selection of clinical isolates for the period 2004-2020.**

In some years, important events are remarked including periods before and after the introduction of the different pneumococcal vaccines in Spain. The years when PCV13 was included in the private market (2010) and the national pediatric vaccination calendar (2016) are mentioned to see the impact of these events in antimicrobial resistance and the year 2020 when SARS-CoV-2 appeared.

|                                             | 2004<br>Early<br>PCV-7 | 2008<br>Late<br>PCV-7 | 2012<br>Early<br>PCV-13 | 2016<br>Middle<br>PCV-13 | 2019<br>Late<br>PCV-13<br>and Pre-<br>COVID | 2020<br>Late<br>PCV-13<br>and<br>COVID |
|---------------------------------------------|------------------------|-----------------------|-------------------------|--------------------------|---------------------------------------------|----------------------------------------|
| Total strains characterized                 | 3169                   | 4637                  | 3415                    | 2426                     | 3154                                        | 2171                                   |
| Total strains (PEN-S)                       | 2041<br>(64%)          | 3280<br>(71%)         | 2363<br>(69%)           | 1817<br>(75%)            | 2568<br>(81%)                               | 1653<br>(76%)                          |
| Total strains (PEN-I/R)                     | 1128<br>(36%)          | 1357<br>(29%)         | 1052<br>(31%)           | 609<br>(25%)             | 586<br>(19%)                                | 518<br>(24%)                           |
| Selected strains in this<br>study (PEN-I/R) | 501                    | 498                   | 500                     | 500                      | 500                                         | 518                                    |
| Average age of patients                     | 44                     | 52                    | 57                      | 57                       | 57                                          | 61                                     |
| IPD isolates                                | 289                    | 258                   | 206                     | 226                      | 381                                         | 399                                    |
| Non-bacteraemic<br>pneumonia isolates       | 211                    | 240                   | 294                     | 274                      | 119                                         | 119                                    |

**Table S1: Distribution of pneumococcal strains per year.** Data include the total number of strains characterized at the Spanish Pneumococcal Reference Laboratory per year, the number of penicillin susceptible strains (PEN-S) or with reduced susceptibility to penicillin (PEN-I/R) and the number of selected strains for this study among PEN I/R isolates. The percentage indicate the proportion of (PEN-S or PEN-I/R). The average age of hospitalized patients and the number of IPD isolates or non-bacteraemic pneumonia isolates are also included.

| MIC breakpoints (mg/L) |       |     |
|------------------------|-------|-----|
|                        | S ≤   | R > |
| Penicillin             | 0·06  | 2   |
| Amoxicillin            | 0·5   | 1   |
| Cefotaxime             | 0·5   | 2   |
| Cefpodoxime            | 0·25  | 0·5 |
| Cefixime               | 0·5   | 2   |
| Cefditoren             | 0·5   | 2   |
| Erythromycin           | 0·25  | 0·5 |
| Levofloxacin           | 0·001 | 2   |

**Table S2: Breakpoints considered for susceptible and resistant strains.** We followed EUCAST guidelines. For those antibiotics without a defined breakpoint by EUCAST or CLSI such as cefixime and cefditoren, we used the same breakpoints as cefotaxime.

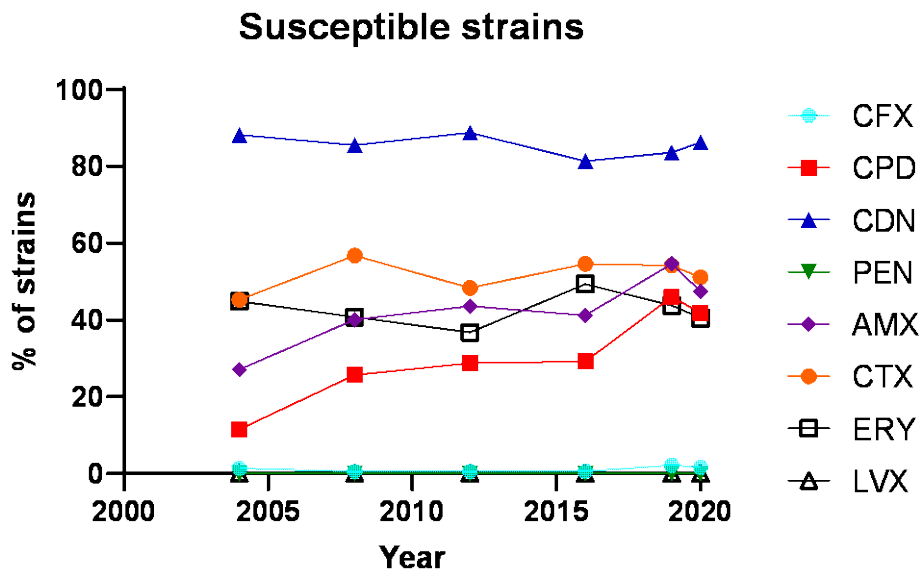

**Figure S2: Evolution of susceptible strains to different antibiotics during the period 2004-2020.** The antibiotics tested were CFX (cefixime), CPD (cefepodoxime), CDN (cefditoren), PEN (penicillin), AMX (amoxicillin), CTX (cefotaxime), ERY (erythromycin), and LVX (levofloxacin).
